# Supplementary material for: The UDP-Glycosyltransferase Family in Drosophila melanogaster: Nomenclature Update, Gene Expression and Phylogenetic Analysis
Source: Front Physiol. 2021 Mar 17;12:648481. doi: 10.3389/fphys.2021.648481 (PMC8010143; doi:10.3389/fphys.2021.648481)
Supplement: Supplementary file 5 [file Table_5.XLSX]

## Sheet: Sheet1
Family	Subfamily	OrthoDB (v9.1) group	OrthoDB (v10.1) group
UGT35	UGT35A	EOG091908E6	9688at7215
	UGT35B	EOG091905V4	8028at7215
	UGT35C	EOG091909TA	11638at7215
	UGT35D	EOG09190699	10145at7215
	UGT35E
UGT36	UGT36A	EOG091906AF	10197at7215
	UGT36D	EOG091902ZF	3452at7215
			6540at7215
	UGT36E	EOG0919068C	12663at7215
	UGT36F	EOG091905Y5	8298at7215
UGT37	UGT37A	EOG091906LE / EOG091905ZO / EOG09190LCX	9572at7215 + 9460at7215 / 15027at7215
	UGT37B
	UGT37C	EOG091904GQ	9024at7215
	UGT37D	EOG091905SF	8050at7215
	UGT37E	EOG091905OT	9704at7215
UGT49	UGT49B	EOG091906W8 / EOG091909R3	8604at7215 / 28535at7215 / 28542at7215
		EOG091905VV	8989at7215
	UGT49C	EOG091905U3	7138at7215
UGT50	UGT50B	EOG091905X3	7492at7215
	UGT50F	n/a	28415at7215
UGT301	UGT301D	EOG091906Q3	8238at7215
UGT302	UGT302C	EOG091905ZI	9044at7215 / 28503at7215
	UGT302E	EOG091908FU	10067at7215
	UGT302K	EOG091906NJ / EOG09190LK7	8316at7215
UGT303	UGT303A	EOG0919066F	8345at7215
	UGT303B	EOG091906AU	9723at7215
UGT304	UGT304A	EOG091905PF	9960at7215
UGT305	UGT305A	EOG09190AUN	13042at7215
UGT307	UGT307A	EOG0919063L	13310at7215
UGT316	UGT316A	EOG09190739	8475at7215
UGT317	UGT317A	EOG091906DB	11614at7215
UGT401	UGT401A	EOG09190L87	9556at7215
